# Supplementary material for: Znf703 is a novel RA target in the neural plate border
Source: PubMed Central journal article supplement (PMC6547707; doi:10.1038/s41598-019-44722-1), 2019-06-04
Supplement: 41598_2019_44722_MOESM1_ESM.pdf [file 41598_2019_44722_MOESM1_ESM.pdf]

## **Supplementary Information**

### ***Znf703* is a novel RA target in the neural plate border**

Amanda Janesick, Weiyi Tang, Kristen Ampig, Bruce Blumberg

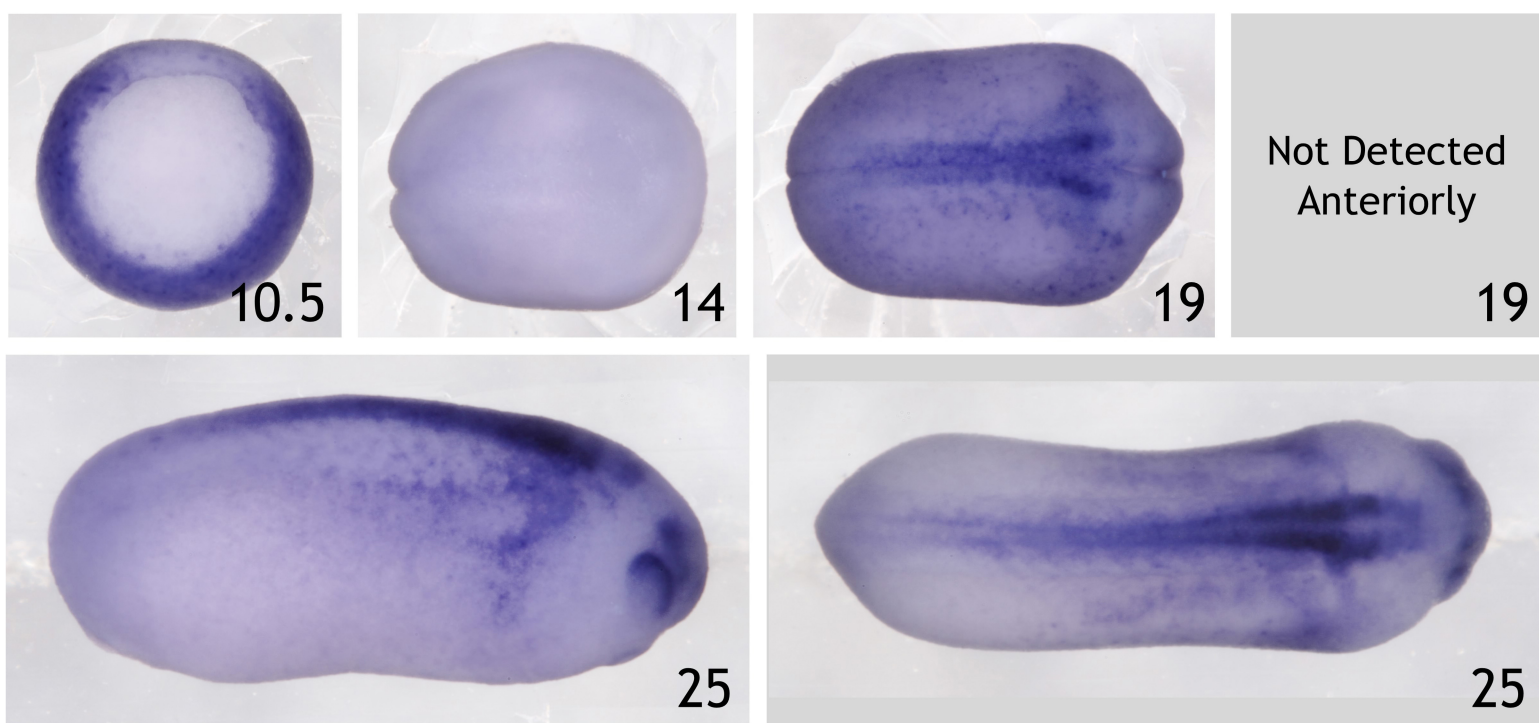

**Supplemental Figure S1. Expression of *Znf503* across developmental time.** Whole mount in situ hybridization of *Znf503* expression at Nieuwkoop and Faber developmental stages 10.5 (vegetal view, dorsal at the top), 14 (dorsal view, anterior on the left), 19 (dorsal and anterior views), and 25 (lateral and dorsal views, anterior on the right).

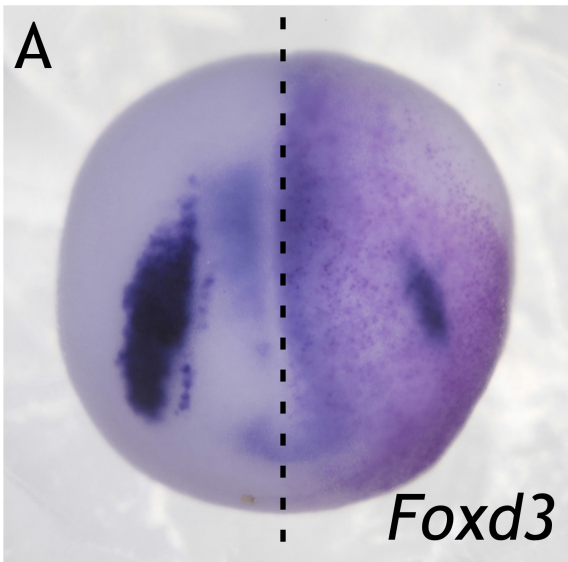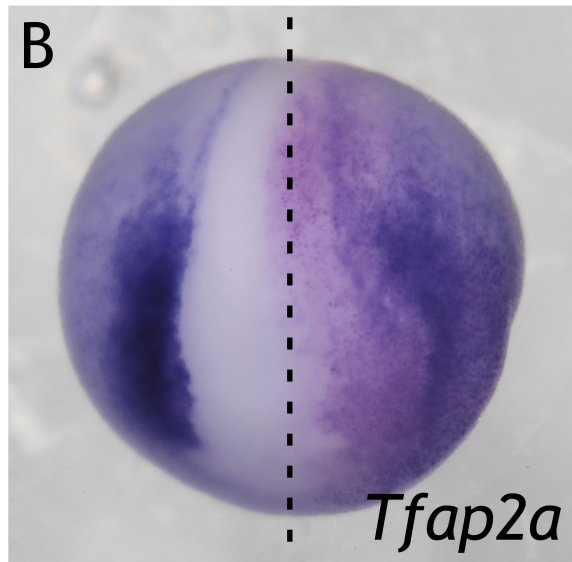

**Supplemental Figure S2. Overexpression of *Znf703* mRNA inhibits early neural crest markers.** Embryos were injected unilaterally at 2- or 4-cell stage with 0.5 ng *Znf703* mRNA. Injected side is to the right of the dotted line, indicated by magenta  $\beta$ -gal lineage tracer. Embryos are shown at stage 14 in anterior view. *Znf703* mRNA knocks down expression of **(A)** *Foxd3* and **(B)** *Tfap2a*.



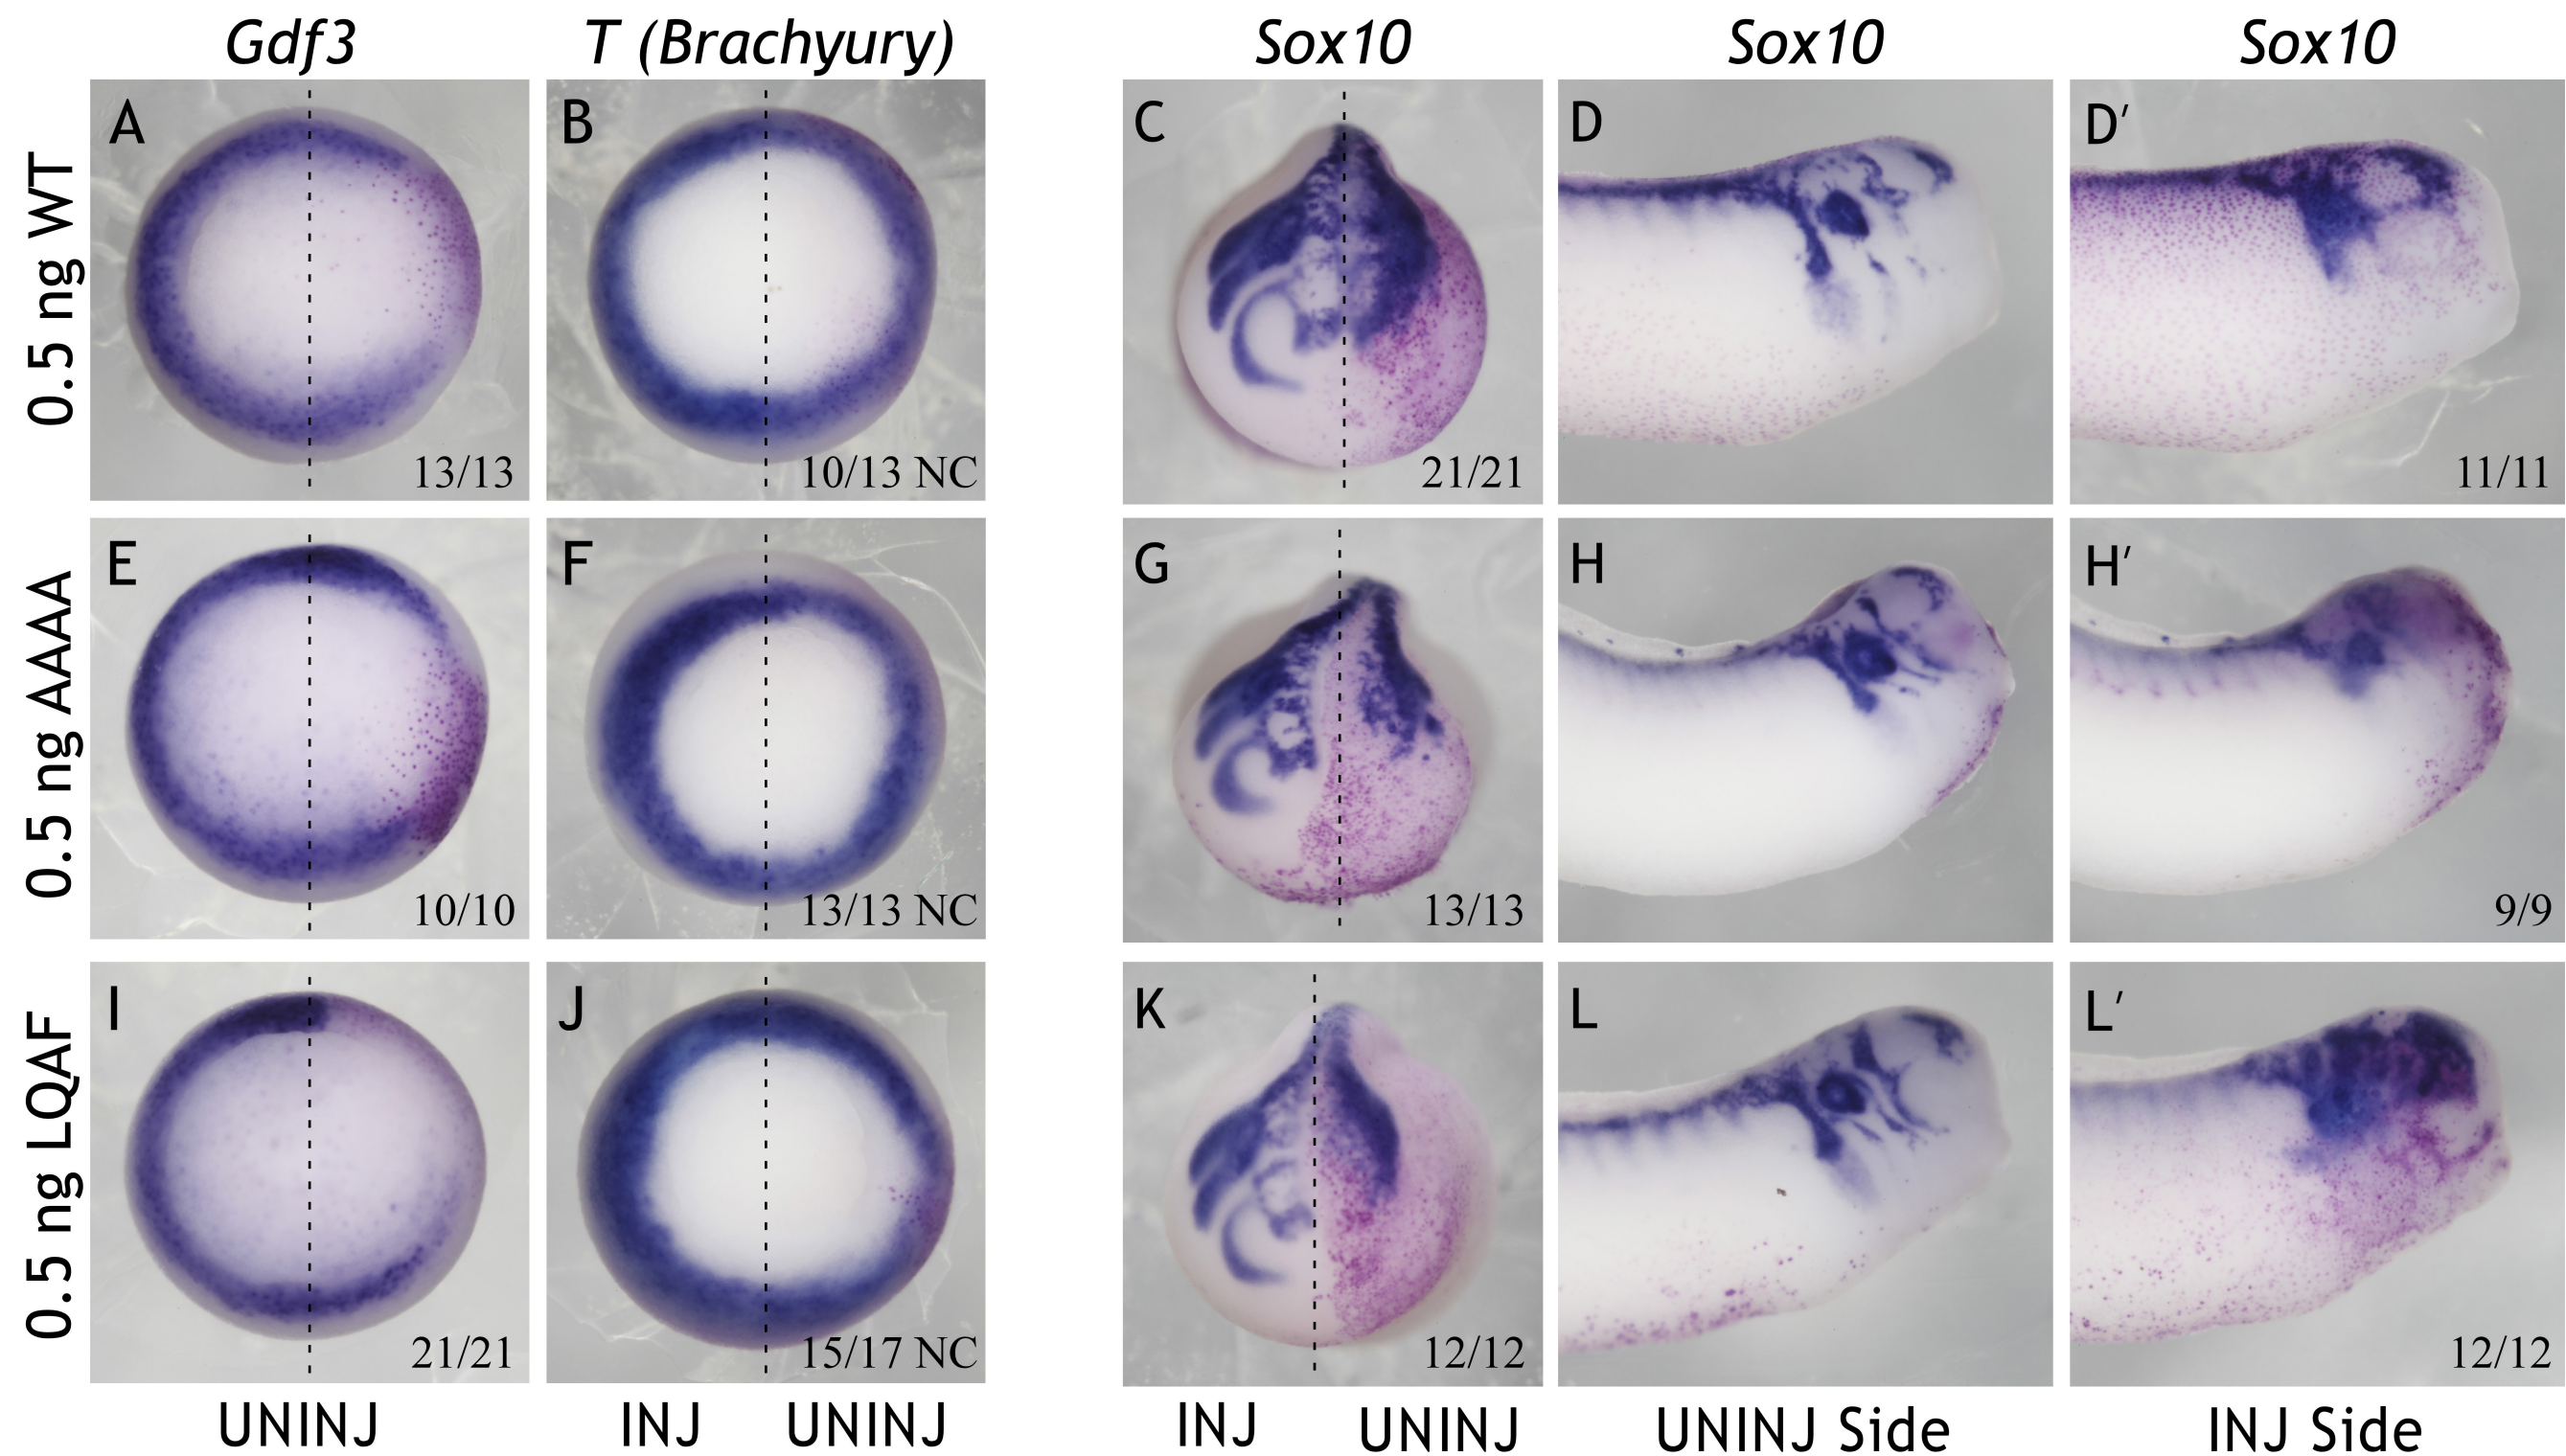

**Supplemental Figure S3. Mutation of the FKPY domain does not alter the *Znf703* overexpression phenotype on *Gdf3*, *Wnt8* or *Sox10*.** Embryos were injected unilaterally at 2- or 4-cell stage with 0.5 ng *Znf703* wildtype or mutant (FKPY→AAAA or FKPY→LQAF) mRNA. (A, B, E, F, I, J) Stage 10.5/11 embryos shown in vegetal view with injected side to the right of the dotted line, indicated by the magenta  $\beta$ -gal lineage tracer (LT). *Znf703* mRNA WT or mutant caused knockout of *Gdf3* and no change or very weak knockdown of *T*. (C, G, K) Stage 19 embryos in anterior view with injected side to the right of the dotted line, indicated by the LT. *Znf703* WT or mutant mRNA reduces the lateral and anterior expression of *Sox10*. (D, H, L) Stage 27 embryos in lateral view showing the uninjected side or injected side (D', H', L'). *Znf703* mRNA inhibits the ventral migration, and disrupts patterning of *Sox10*. Fractions represent the portion of embryos displaying the phenotype. NC = no change.



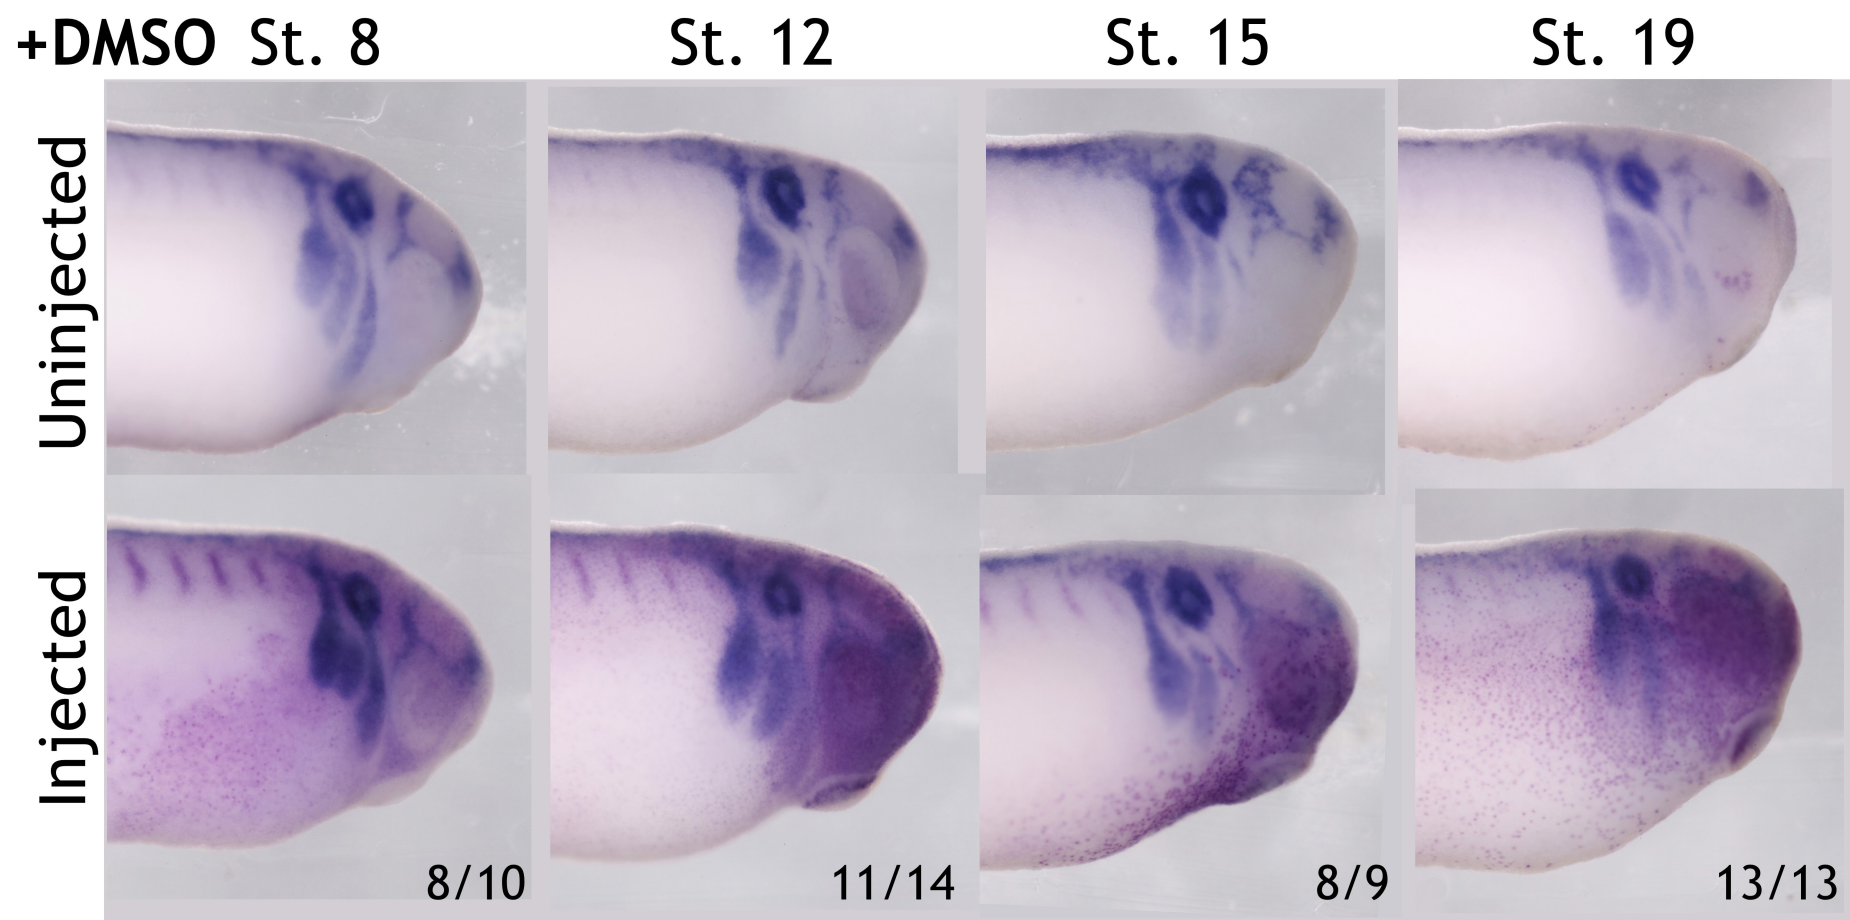

**Supplemental Figure S4. hGR-*Znf703* has no effect on *Sox10* expression in the absence of DEX.** Embryos were injected unilaterally with 0.2 ng hGR-*Znf703* mRNA at 2- or 4-cell stage, then treated with 5  $\mu$ M DEX or 0.05% DMSO vehicle at the stages indicated. Injected side is indicated by the magenta  $\beta$ -gal mRNA lineage tracer. DEX treated embryos are pictured in **Fig. 6**. hGR-*Znf703* overexpression in the presence of DMSO control vehicle shows little or no effect on *Sox10* expression at all stages tested. All embryos are shown in lateral view with anterior on the right, at stage 27. Fractions represent the scoring of embryos displaying the phenotype of no change compared to the uninjected side.

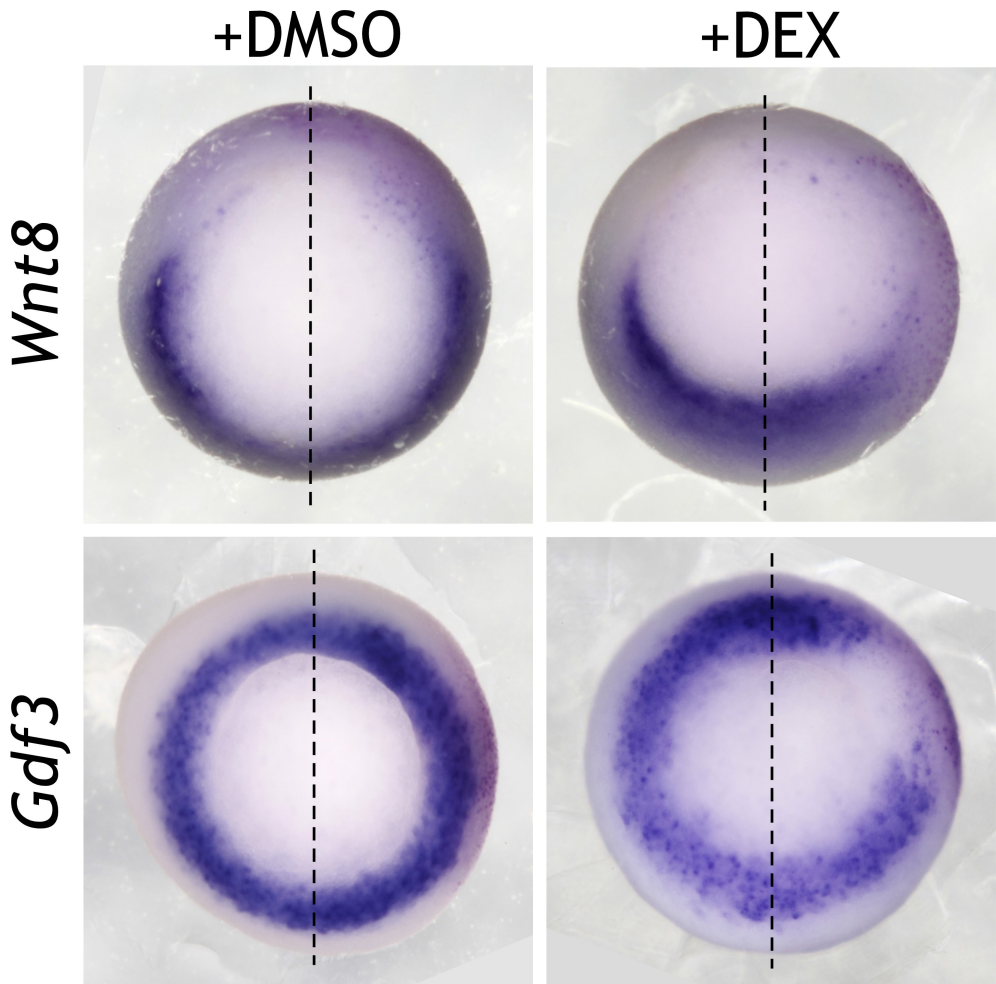

**Supplemental Figure S5. hGR-Znf703 yields the same result as wildtype Znf703 on mesodermal markers.** Embryos were injected unilaterally with 0.2 ng hGR-Znf703 mRNA at 2- or 4-cell stage, then treated with 5  $\mu$ M DEX or 0.05% DMSO vehicle at stage 8. Injected side is indicated by the magenta  $\beta$ -gal mRNA lineage tracer. Stage 11 embryos are shown in vegetal view with the dorsal lip at the top.

Treat St. 12

Treat St. 15

DMSO

DEX

DMSO

DEX

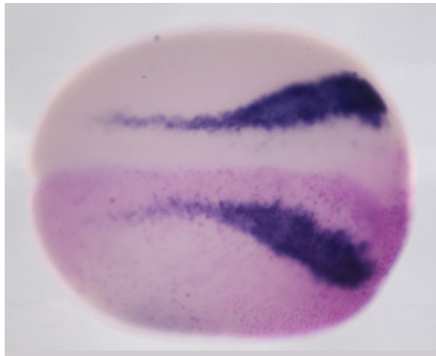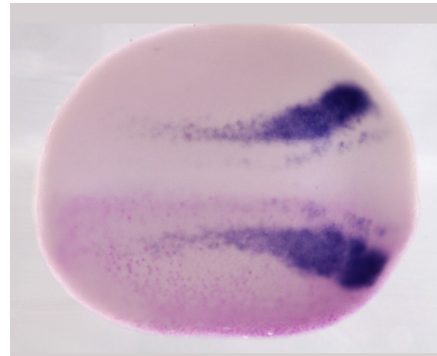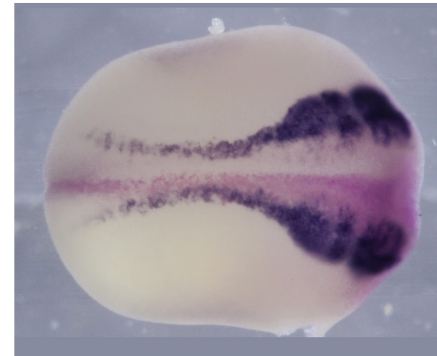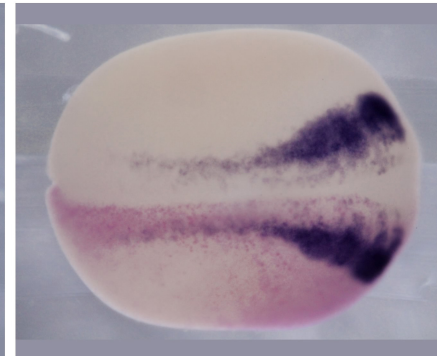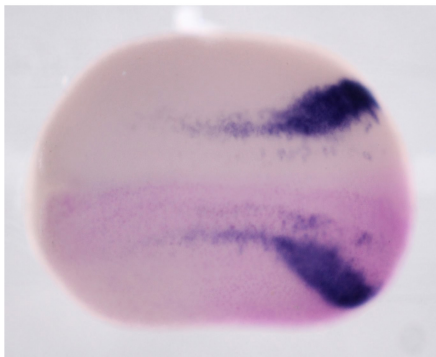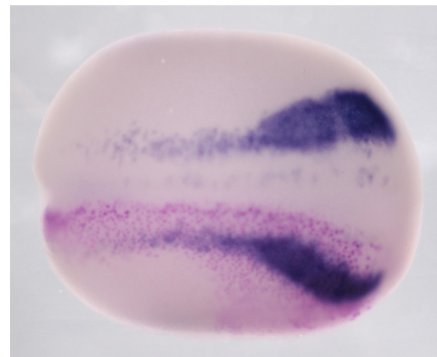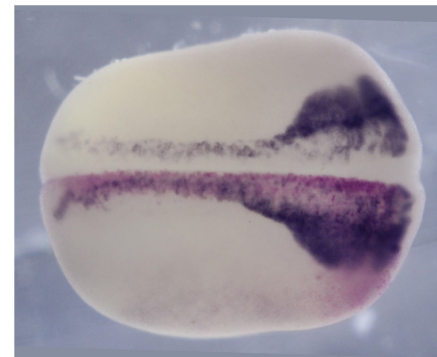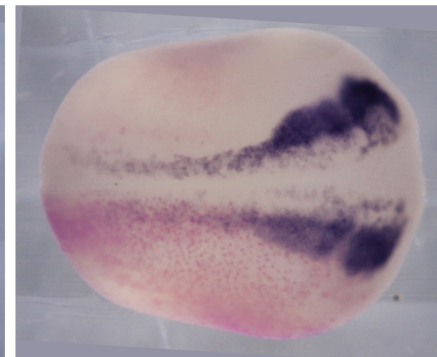

9/9

17/17

15/15

23/23

**Supplemental Figure S6. hGR-*Znf703* induced at stage 12 or 15 has no effect on *Slug* expression at stage 18/19.** Embryos were injected unilaterally with 0.2 ng hGR-*Znf703* mRNA at 2- or 4-cell stage, then treated with 5  $\mu$ M DEX or 0.05% DMSO vehicle at the stages 12 or 15. Injected side is indicated by the magenta  $\beta$ -gal mRNA lineage tracer. hGR-*Znf703* overexpression in the presence of DMSO vehicle or DEX shows no effect on *Slug* expression at stage 18/19. All embryos are shown in dorsal view with anterior on the right. Fractions represent the scoring of embryos displaying the phenotype of no change compared to the uninjected side.



+DMSO

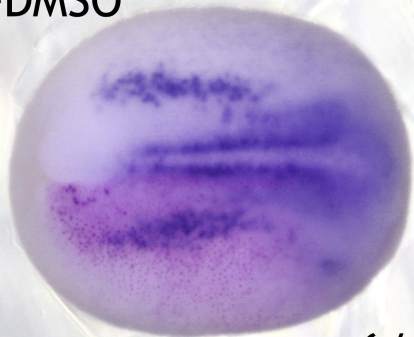

6/6

+DEX

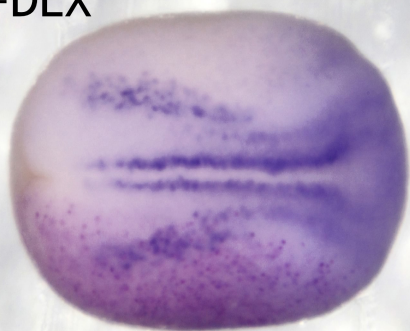

6/7

**Supplemental Figure S7. hGR-*Znf703* does not increase neuronal differentiation.** Embryos were injected unilaterally with 0.2 ng hGR-*Znf703* mRNA at 2- or 4-cell stage, then treated with 5  $\mu$ M DEX or 0.05% DMSO vehicle at stage 12. Injected side is indicated by the magenta  *$\beta$ -gal* mRNA lineage tracer. All embryos are shown in dorsal view at stage 14 with anterior on the right.

## Supplemental Table S1 (Probe Design)

### Probes with T7 Adapters

| Primer                   | Sequence (5'→3')                            |
|--------------------------|---------------------------------------------|
| Znf703_Probe_For         | AGCTGAATTCTGTGACCTCCAG                      |
| Znf703_Probe_Rev         | taatacgactcactatagggCATAAAGCCGTAGGTGTACAAGG |
| Znf503_Probe_For         | CCACTGGGTTCTGGAAGTCG                        |
| Znf503_Probe_Rev         | taatacgactcactatagggTTTATAGGGTGACACAGGTGC   |
| Sox10_Probe_For          | GATGACCAAAGCTTGTCCGA                        |
| Sox10_Probe_Rev          | TAATACGACTCACTATAGGGgctggtcccaatgtgtagg     |
| Twist1_Probe_For         | GACAGTCTGAGTAACAGCGAGGA                     |
| Twist1_Probe_Rev         | taatacgactcactatagggTCCACACGGAGAAGGCATAGC   |
| Tfap2a_Probe_For         | CCCAGTCTCAAGATCCCTACTCC                     |
| Tfap2a_Probe_Rev         | taatacgactcactatagggCCGATTGACAAATTCAGCCGC   |
| Foxd3_Probe_For          | GGACAAGGACAGTGAGTGCG                        |
| Foxd3_Probe_Rev          | taatacgactcactatagggTCTATGCTGAAGGAGGGTCCG   |
| Snai2_Probe_For          | GTCAAGAAACACTTCAACTCGGC                     |
| Snai2_Probe_Rev          | taatacgactcactatagggACAGCAACCAGATTCCTCATGCT |
| Eya1_Probe_For           | GTTCCGCGTATCCTTCACAT                        |
| Eya1_Probe_Rev           | taatacgactcactatagggTGAATGCTTTTTGGCTCCTT    |
| Chicken_Znf703_Probe_For | CCTTCCAGCATCGGTTACCAC                       |
| Chicken_Znf703_Probe_Rev | taatacgactcactatagggTGGCAAACCTCTTATCGCAG    |

### Supplemental Table S2 (RT-QPCR)

| Primer          | Sequence (5'→3')       |
|-----------------|------------------------|
| Znf703_QPCR_For | GCTGATCAACATGCTGACGG   |
| Znf703_QPCR_Rev | CGGCTTCCCTATCTGTGAGC   |
| Znf503_QPCR_For | CCCGAATACCTTCAACCTCTGC |
| Znf503_QPCR_Rev | GTCTGGCTTCCCGATCTGTG   |

### Supplemental Table S3 (Two-Fragment PCR)

| Primer                  | Sequence (5'→3')                             |
|-------------------------|----------------------------------------------|
| pCDG1_Znf703.L_For (A)  | CAGATACCATGGACTGTTCTCCCCCTGGATCTAGC          |
| pCDG1_Znf703.L_LQAF (B) | CCCTTCGAAAATGCTTGCAAGCTAGACTTATCCTCCAAAGGAGA |
| pCDG1_Znf703.L_AAAA (B) | CCCTTCGAAGCTGCAGCTGCGCTAGACTTATCCTCCAAAGGAGA |
| pCDG1_Znf703.L_LQAF (C) | CTAGCTTGCAAGCATTTCGAAGGGTGGGGAGACCAG         |
| pCDG1_Znf703.L_AAAA (C) | CTAGCGCAGCTGCAGCTTCGAAGGGTGGGGAGACCAG        |
| pCDG1_Znf703.L_Rev (D)  | ACTAGTGGATCCCTATTACTGGTATCCTAGCGCTGAAG       |

### Supplemental Table S4 (Gal-Znf703)

| Primer                    | Sequence (5'→3')                      |
|---------------------------|---------------------------------------|
| pCMX-GAL_Zeppo1_For       | TCGCCGGAATTCATGGACTGTTCTCCCCCTGGATC   |
| pCMX-GAL_Zeppo1_(ZFD)_For | TCGCCGGAATTCTCTGGTCACCCCTTGACACCTAC   |
| pCMX-GAL_Zeppo1_(Btd)_For | TCGCCGGAATTCACAGCCCTCTGACTGGTGC       |
| pCMX-GAL_Zeppo1_Rev       | TGGCCAGGATCCCTATTACTGGTATCCTAGCGCTGAA |
